# Supplementary material
Source: publisher site journal article supplement (https://vertebrate-zoology.arphahub.com/article/78234/download/suppl/32/)
Supplement: Supplementary file 1

taxon	genus	species	institute	accession	olbrichtID	source	ageInDays	SC	CBL	carea	dcarea	p1area	dp1area	p2area	dp2area	p3area	dp3area	p4area	dp4area	m1area	m2area	m3area	m4area	PREdp1	PREdp2	PREdp3	PREdp4	PREm1	PREm2	PREm3	PREm4
Macropro	Macroscelides	proboscideus	UMZC	2011_1_8	w60	skyscanner	0	12.9	17.4	NA	NA	NA	NA	NA	NA	NA	1.6	NA	4.34	NA	NA	NA	NA	NA	-1.14	NA	NA	7.08	NA	NA	NA
Macropro	Macroscelides	proboscideus	UMZC	2011_1_3	w50	skyscanner	2	13.1	18.1	NA	0.4048	NA	NA	NA	0.6528	NA	1.56	NA	4.2174	NA	NA	NA	NA	-0.2544	-1.0974	2.4351	2.4672	6.8748	NA	NA	NA
Macropro	Macroscelides	proboscideus	UMZC	2011_1_6	w57	CBC	3	11.7	16.9	NA	0.3312	NA	NA	NA	0.3914	NA	1.323	NA	3.4892	NA	NA	NA	NA	-0.5402	-0.8432	1.9403	2.2546	5.6554	NA	NA	NA
Macropro	Macroscelides	proboscideus	UMZC	2011_1_7	w58	CBC	3	12.5	17.5	NA	0.3285	NA	NA	NA	0.4935	NA	1.4454	NA	3.799	NA	NA	NA	NA	-0.4584	-0.9082	2.14625	2.3973	6.1526	NA	NA	NA
Macropro	Macroscelides	proboscideus	UMZC	2011_1_4	w53	CBC	16	16.8	22.1	NA	0.36	NA	0.55	NA	0.84	NA	1.68	NA	4.34	NA	NA	NA	NA	-2.22044604925031e-16	-0.98	2.59	2.52	7	NA	NA	NA
Macropro	Macroscelides	proboscideus	UMZC	w43	w43	CBC	38	21.2	27.5	NA	0.36	NA	0.65	NA	0.84	NA	1.89	NA	4.8	NA	NA	NA	NA	-0.21	-1.02	2.82	2.94	7.71	NA	NA	NA
Macropro	Macroscelides	proboscideus	UMZC	2021_37	w3	CBC	69	21.3	27.3	0.72	0.36	NA	0.72	NA	1.05	NA	1.8	NA	4.35	3.68	2.6	NA	NA	0.3	-0.75	5.02	4.76	6.9	3.01	1.52	NA
Macropro	Macroscelides	proboscideus	UMZC	w11	w11	CBC	101	22.9	28.6	0.5	NA	NA	0.55	0.84	0.7	1.02	1.4	2.99	4.06	3.08	2.47	NA	NA	0	-1.26	5.04	3.69	6.72	2.1	1.86	NA
Macropro	Macroscelides	proboscideus	UMZC	w64	w64	CBC	113	23.4	30.2	0.78	NA	NA	0.72	1.05	0.9	1.71	1.98	3.6	4.65	3.84	2.7	NA	NA	-0.18	-0.69	5.46	4.98	7.32	3.03	1.56	NA
Macropro	Macroscelides	proboscideus	UMZC	w15	w15	CBC	122	23.1	29.2	0.78	NA	NA	0.78	1.05	0.84	1.71	1.6	3.36	NA	3.84	2.6	NA	NA	0.08	NA	NA	5.08	NA	NA	1.36	NA
Macropro	Macroscelides	proboscideus	UMZC	w37	w37	cam-engineering	145	23	NA	NA	NA	NA	NA	NA	NA	NA	NA	NA	NA	NA	NA	NA	NA	NA	NA	NA	NA	NA	NA	NA	NA
Macropro	Macroscelides	proboscideus	UMZC	w30	w30	CBC	157	22.8	28.9	0.72	NA	NA	0.72	1.12	NA	1.62	NA	3.6	NA	3.6	2.85	NA	NA	NA	NA	NA	4.35	NA	NA	2.1	NA
Macropro	Macroscelides	proboscideus	UMZC	w45	w45	CBC	195	23.9	30.6	0.65	NA	NA	0.6	1.05	NA	1.52	NA	3.5	NA	3.45	2.8	NA	NA	NA	NA	NA	4.1	NA	NA	2.15	NA
Macropro	Macroscelides	proboscideus	UMZC	2021_38	w39	CBC	326	23	30.3	0.55	NA	NA	0.6	1.05	NA	1.36	NA	3.08	NA	3.22	2.34	NA	NA	NA	NA	NA	4.1	NA	NA	1.46	NA
Macropro	Macroscelides	proboscideus	UMZC	w12	w12	CBC	426	24	29.8	0.6	NA	NA	0.72	1.05	NA	1.36	NA	3.6	NA	3.45	3	NA	NA	NA	NA	NA	3.9	NA	NA	2.55	NA
Macropro	Macroscelides	proboscideus	UMZC	w56	w56	CBC	1982	23.9	30.1	0.72	NA	NA	0.55	1.05	NA	1.28	NA	3.6	NA	3.3	2.66	NA	NA	NA	NA	NA	3.94	NA	NA	2.02	NA
Macropro	Macroscelides	proboscideus	FMNH	137045		morphosource	NA	NA	NA	0.78	NA	NA	0.6	1.28	NA	1.71	NA	3.75	NA	3.68	3.04	NA	NA	NA	NA	NA	4.32	NA	NA	2.4	NA
Procacap	Procavia	capensis	UMZC	H4981E		CBC	NA	NA	NA	NA	NA	NA	4.96	NA	9.66	NA	13.77	NA	20.15	22.1	NA	NA	NA	5.55	7.39	18.2	17.88	26.53	24.05	NA	NA
Procacap	Procavia	capensis	UMZC	H4980K		CBC	NA	NA	NA	NA	NA	NA	4.8	13.16	NA	20.4	NA	NA	NA	28.7	39.6	NA	NA	NA	NA	NA	17.8	NA	NA	50.5	NA
Procacap	Procavia	capensis	UMZC	H4981C		CBC	NA	NA	NA	NA	NA	NA	4.8	NA	9.43	NA	13.3	NA	15.68	19.38	NA	NA	NA	5.56	10.92	11.98	17.17	18.06	23.08	NA	NA
Procacap	Procavia	capensis	UMZC	H4981D		CBC	NA	NA	NA	NA	NA	NA	5.61	NA	11	NA	14	NA	16.53	22.32	NA	NA	NA	8	11.47	10.74	17	19.06	28.11	NA	NA
Procacap	Procavia	capensis	UMZC	H5051A		CBC	NA	NA	NA	NA	NA	5.32	NA	15.5	NA	20.52	NA	27.3	22.68	23.68	29.2	NA	NA	NA	NA	21.68	18.16	25.94	24.68	34.72	NA
Procacap	Procavia	capensis	UMZC	H4980J		CBC	NA	NA	NA	NA	NA	3.84	NA	13.63	NA	19.98	NA	25.01	19.14	25.74	30	NA	NA	NA	NA	12.54	21.48	24.57	32.34	34.26	NA
Procacap	Procavia	capensis	UMZC	H5101A		CBC	NA	NA	NA	NA	NA	NA	NA	10.53	NA	17.02	NA	22.26	NA	25.74	30.24	28.5	NA	NA	NA	NA	21.24	31.98	27.12	34.74	26.76
Procacap	Procavia	capensis	MNHN	1901_685f		ISEM	NA	NA	NA	NA	NA	NA	5.44	NA	14.5	NA	21.24	NA	24.84	NA	NA	NA	NA	7.76	20.72	19.67	27.98	22.28	NA	NA	NA
Procacap	Procavia	capensis	UMZC	H5081A		CBC	NA	NA	NA	NA	NA	7.82	NA	16.83	NA	22.04	NA	31.28	NA	29.24	39.2	36.9	NA	NA	NA	NA	19.28	41.5	33.07	49.16	34.6
Procacap	Procavia	capensis	UMZC	H5081B		CBC	NA	NA	NA	NA	NA	8.88	NA	15.36	NA	19.98	NA	27.09	NA	29.93	31.92	32.37	NA	NA	NA	NA	27.94	31.47	31.15	33.91	32.82
Canislat	Canis	latrans	UMZC	K3341		CBC	NA	149.3	190.7	69.96	NA	14.35	NA	34.96	NA	48.16	NA	67.65	NA	186.96	64.86	18.4	NA	NA	NA	NA	309.06	111.32	102.68	-57.24	-28.06
Canislat	Canis	latrans	UMZC	K3348		CBC	NA	67.5	89.9	NA	10.81	NA	NA	NA	11.34	NA	14.64	NA	50.85	NA	NA	NA	NA	8.04	-21.57	31.095	17.94	87.06	NA	NA	NA
Canislup	Canis	lupus	UMZC	K3051		CBC	NA	78.2	100.9	NA	10.25	NA	NA	NA	10.56	NA	15.08	NA	38.95	NA	NA	NA	NA	6.04	-8.79	24.755	19.6	62.82	NA	NA	NA
Canislup	Canis	lupus	UMZC	K3014		CBC	NA	114.7	NA	NA	15.68	16.34	NA	NA	12.19	NA	19.6	NA	50.85	NA	NA	NA	NA	4.78	-11.65	31.52	27.01	82.1	NA	NA	NA
Canislup	Canis	lupus	UMZC	K3150.3		CBC	NA	183.1	233.1	159.58	NA	38.88	NA	85.15	NA	95.91	NA	121.66	NA	335.24	131.32	34.77	NA	NA	NA	NA	539.16	227.87	185.005	-72.6	-61.78
Canislup	Canis	lupus	USNM	291012		morphosource	NA	175.6	219	197.12	NA	32	NA	95.76	NA	114.48	NA	149.24	NA	383.75	127.07	41.6	NA	NA	NA	NA	640.43	212.54	212.675	-129.61	-43.87
Canislup	Canis	lupus	USNM	507338		morphosource	NA	158.2	201	181.65	NA	32	NA	86.8	NA	105.7	NA	153.12	NA	343.36	117.8	45.36	NA	NA	NA	NA	568.92	190.24	194.36	-107.76	-27.08
Canislup	Canis	lupus	USNM	98311		morphosource	NA	167.8	210.7	100.04	NA	27.36	NA	47.04	NA	82.96	NA	106.5	NA	255.53	92.65	27.5	NA	NA	NA	NA	418.41	157.8	141.515	-70.23	-37.65
Canislup	Canis	lupus	USNM	98037		morphosource	NA	169.7	216.2	101.64	NA	28.91	NA	70.2	NA	117.04	NA	110.16	NA	283.92	108.9	30.68	NA	NA	NA	NA	458.94	187.12	157.3	-66.12	-47.54
Canislup	Canis	lupus	BMNH	2005-205		NHM	NA	47	NA	NA	4.94	NA	NA	NA	6.08	NA	11.22	NA	27.84	NA	NA	NA	NA	0.94	-5.4	16.96	16.36	44.46	NA	NA	NA
Canislup	Canis	lupus	BMNH	1919-7-7-3633		NHM	1	37.1	48.7	NA	NA	NA	NA	NA	NA	NA	NA	NA	NA	NA	NA	NA	NA	NA	NA	NA	NA	NA	NA	NA	NA
Canislup	Canis	lupus	BMNH	1919-7-7-3634		NHM	5	40.6	53.4	NA	NA	NA	NA	NA	NA	NA	NA	NA	NA	NA	NA	NA	NA	NA	NA	NA	NA	NA	NA	NA	NA
Canislup	Canis	lupus	BMNH	1919-7-7-3635		NHM	10	46.1	61.6	NA	NA	NA	NA	NA	NA	NA	NA	NA	NA	NA	NA	NA	NA	NA	NA	NA	NA	NA	NA	NA	NA
Canislup	Canis	lupus	BMNH	1919-7-7-3636		NHM	18	52.7	69.9	NA	NA	NA	NA	NA	NA	NA	20.3	NA	50.31	NA	NA	NA	NA	NA	-9.71	NA	NA	80.32	NA	NA	NA
Canislup	Canis	lupus	BMNH	1919-7-7-3644		NHM	33	68.9	90.9	NA	13.5	NA	NA	NA	12.19	NA	23.25	NA	51.48	NA	NA	NA	NA	1.13	-4.98	31.835	34.31	79.71	NA	NA	NA
Nandibin	Nandinia	binotata	USNM	450440		morphosource	NA	NA	NA	11.5	NA	5.44	NA	12.48	NA	15.6	NA	18.36	NA	30.24	9.9	NA	NA	NA	NA	NA	50.58	NA	NA	-10.44	NA
Nandibin	Nandinia	binotata	USNM	220397		morphosource	NA	NA	NA	15.3	NA	5.27	NA	13.72	NA	17.05	NA	16.74	NA	29.82	9.24	NA	NA	NA	NA	NA	50.4	NA	NA	-11.34	NA
Nandibin	Nandinia	binotata	YPM	14716		morphosource	NA	NA	NA	NA	8.19	5.89	NA	NA	8.4	NA	13	NA	16.24	NA	NA	NA	NA	3.8	9.76	12.32	17.6	19.48	NA	NA	NA
Nandibin	Nandinia	binotata	UMZC	K4492		CBC	NA	NA	NA	24.57	NA	5.22	NA	14.1	NA	17.82	NA	21.66	NA	31.49	NA	NA	NA	NA	NA	NA	NA	NA	NA	NA	NA
Nandibin	Nandinia	binotata	UMZC	K4494		CBC	NA	NA	NA	NA	NA	5.44	NA	12.18	NA	15.68	NA	17.34	NA	31.5	8.4	NA	NA	NA	NA	NA	54.6	NA	NA	-14.7	NA
Nandibin	Nandinia	binotata	UMZC	K4493		CBC	NA	NA	NA	22.42	NA	5.1	NA	14.4	NA	18.7	NA	19.98	NA	34.04	8.4	NA	NA	NA	NA	NA	59.68	NA	NA	-17.24	NA
Nandibin	Nandinia	binotata	UMZC	K4490		CBC	NA	NA	NA	NA	NA	NA	NA	NA	NA	NA	NA	NA	NA	NA	NA	NA	NA	NA	NA	NA	NA	NA	NA	NA	NA
Nandibin	Nandinia	binotata	BMNH	26_7_6_162		NHM	NA	NA	NA	NA	5.6	NA	NA	NA	6.8	NA	11.04	NA	15.39	NA	NA	NA	NA	2.56	6.69	11.095	15.28	19.74	NA	NA	NA
Nandibin	Nandinia	binotata	BMNH	46_356		NHM	NA	NA	NA	NA	6.8	4.65	NA	NA	6.63	NA	10.34	NA	15.96	30.24	NA	NA	NA	2.92	4.72	1.68	14.05	21.58	44.52	NA	NA
Nasuasp	Nasua	sp	DU-EA	182		morphosource	NA	NA	NA	NA	5.7	4.96	NA	NA	8	NA	13.26	NA	32.39	36.48	NA	NA	NA	2.74	-5.87	28.3	18.52	51.52	40.57	NA	NA
Nasuanar	Nasua	narica	UMZC	K1586		CBC	NA	NA	NA	NA	NA	7.03	NA	15.81	NA	22.68	NA	33.88	NA	43.46	49.98	NA	NA	NA	NA	NA	36.94	NA	NA	56.5	NA
Nasuanar	Nasua	narica	UMZC	K1588		CBC	NA	NA	NA	NA	NA	5.27	NA	14.4	NA	22.04	NA	36	NA	45.36	48.23	NA	NA	NA	NA	NA	42.49	NA	NA	51.1	NA
Nasuanar	Nasua	narica	UMZC	K1589		CBC	NA	NA	NA	31.49	NA	5.27	NA	13.16	NA	20.3	NA	30.8	NA	43.89	40.32	NA	NA	NA	NA	NA	47.46	NA	NA	36.75	NA
Nasuanas	Nasua	nasua	UMZC	K1594		CBC	NA	NA	NA	15.36	NA	5.4	NA	13.26	NA	18.81	NA	38.64	NA	48.6	52.8	NA	NA	NA	NA	NA	44.4	NA	NA	57	NA
Nasuanas	Nasua	nasua	BMNH	75_2334		NHM	NA	NA	NA	NA	5.51	5.22	NA	NA	7.98	NA	14.7	NA	31.98	NA	NA	NA	NA	1.26	-2.58	19.98	21.42	49.26	NA	NA	NA
Nasuanas	Nasua	nasua	BMNH	3_7_1_21		NHM	NA	NA	NA	NA	4.48	3.84	NA	NA	7.41	NA	10.8	NA	NA	43.2	NA	NA	NA	4.02	NA	NA	14.19	NA	NA	NA	NA
Otocymeg	Otocyon	megalotis	USNM	429129		morphosource	NA	NA	NA	22.42	NA	3.75	NA	13	NA	15.68	NA	21.7	NA	31.5	29.61	25.2	13.6	NA	NA	NA	33.39	34.02	28.35	27.72	20.79
Otocymeg	Otocyon	megalotis	USNM	429132		morphosource	NA	NA	NA	19.38	NA	4.25	NA	11.25	NA	14.04	NA	21.35	NA	31.05	27.73	23.76	12.95	NA	NA	NA	34.37	31.7	27.405	24.41	19.79
Otocymeg	Otocyon	megalotis	UMZC	K3942		CBC	NA	NA	NA	17.16	NA	2.8	NA	9.2	NA	12.48	NA	17.92	NA	27.69	29.28	22.44	NA	NA	NA	NA	26.1	36.12	25.065	30.87	15.6
Otocymeg	Otocyon	megalotis	BMNH	26_12_7_68		NHM	NA	NA	NA	NA	4.75	NA	NA	NA	4.55	NA	7.36	NA	15.86	NA	NA	NA	NA	1.74	-1.14	10.205	10.17	24.36	NA	NA	NA
Otocymeg	Otocyon	megalotis	BMNH	26_12_7_69		NHM	NA	NA	NA	NA	4.64	NA	NA	NA	4.68	NA	7.31	NA	15.25	NA	NA	NA	NA	2.05	-0.63	9.965	9.94	23.19	NA	NA	NA
Viverzib	Viverra	zibetha	FMNH	104395		morphosource	NA	NA	NA	47.04	NA	10.5	NA	25.92	NA	39.56	NA	59.95	NA	111	24.38	NA	NA	NA	NA	NA	197.62	NA	NA	-62.24	NA
Viverzib	Viverra	zibetha	UMZC	K4262		CBC	NA	NA	NA	NA	NA	11.75	NA	35.15	NA	39	25.76	53.11	46.87	88.44	24.64	NA	NA	NA	4.65	5.3	152.24	67.98	130.01	-39.16	NA
Viversp	Viverra	sp	UMZC	K4258		CBC	NA	NA	NA	NA	12.48	8.36	NA	NA	11.2	NA	24	NA	51.52	NA	NA	NA	NA	-1.6	-3.52	NA	36.8	79.04	NA	NA	NA
Viverzib	Viverra	zibetha	UMZC	K4264		CBC	NA	NA	NA	NA	13.25	NA	NA	NA	11.34	NA	23.49	NA	47.38	NA	NA	NA	NA	-0.81	-0.4	29.36	35.64	71.27	NA	NA	NA
Viversp	Viverra	sp	UMZC	K4265		CBC	NA	NA	NA	NA	NA	5.7	NA	20.15	NA	23.76	NA	35.64	NA	55.62	NA	NA	NA	NA	NA	NA	NA	NA	NA	NA	NA
Vivertan	Viverra	tangalanga	BMNH	99_12_9_16		NHM	NA	NA	NA	NA	7.41	NA	NA	NA	9.35	NA	15.64	NA	24.3	NA	NA	NA	NA	3.06	6.98	NA	21.93	32.96	NA	NA	NA
Saghabow	Saghatherium	bowni	DPC	17844		DPC	NA	NA	NA	NA	NA	NA	7.77	NA	11	NA	19.38	NA	23.01	36	39.6	NA	NA	2.62	15.75	10.02	32.4	26.64	48.99	43.2	NA
Saghabow	Saghatherium	bowni	DPC	24040		DPC	NA	NA	NA	NA	NA	NA	8.05	NA	12.42	NA	20.06	NA	23.01	34.3	NA	NA	NA	4.78	17.11	11.72	27.7	25.96	45.59	NA	NA
Saghabow	Saghatherium	bowni	DPC	11684		DPC	NA	NA	NA	NA	NA	NA	7.2	NA	11.25	NA	NA	NA	NA	36.2	NA	NA	NA	NA	NA	NA	NA	NA	NA	NA	NA
Saghabow	Saghatherium	bowni	DPC	16527		DPC	NA	NA	NA	NA	NA	NA	8.14	NA	11.75	NA	19.72	NA	23.01	NA	44.64	NA	NA	3.78	16.43	17.38	27.69	26.3	NA	NA	NA
Saghabow	Saghatherium	bowni	DPC	13282		DPC	NA	NA	NA	NA	NA	11.96	NA	13.63	NA	18.87	NA	25.76	NA	35.84	46.02	71.39	NA	NA	NA	NA	25.66	20.65	53.615	56.2	96.76
Saghabow	Saghatherium	bowni	DPC	12048		DPC	NA	NA	NA	8.74	NA	14.4	NA	16.5	NA	24.4	NA	30.6	NA	41.89	61.64	102.96	NA	NA	NA	NA	22.14	20.32	72.425	81.39	144.28
Saghabow	Saghatherium	bowni	DPC	11451		DPC	NA	NA	NA	NA	NA	NA	7.8	NA	12.69	NA	22.94	NA	27.28	40.28	NA	NA	NA	2.44	18.6	14.28	33.19	31.62	53.28	NA	NA
Saghabow	Saghatherium	bowni	DPC	16845		DPC	NA	NA	NA	NA	NA	NA	8.74	NA	11.75	NA	21.7	NA	23.4	34.79	NA	NA	NA	1.8	19.22	13.08	31.65	26.66	46.38	NA	NA
Saghabow	Saghatherium	bowni	DPC	11919		DPC	NA	NA	NA	NA	NA	NA	8.58	NA	12.69	NA	21.35	NA	23.79	33.81	NA	NA	NA	4.03	17.9	16.23	30.01	28.25	41.94	NA	NA
Thyrolit	Thyrohyrax	litholagus	DPC	18227		DPC	NA	NA	NA	NA	NA	NA	15.12	NA	NA	NA	NA	NA	40.18	54.32	NA	NA	NA	NA	NA	NA	NA	NA	NA	NA	NA
Thyrolit	Thyrohyrax	litholagus	DPC	20624		DPC	NA	NA	NA	NA	NA	NA	15.39	NA	25.9	NA	36.8	NA	48.72	63.36	NA	NA	NA	15	24.88	34.08	47.7	60.64	78	NA	NA
Thyrolit	Thyrohyrax	litholagus	DPC	21027		DPC	NA	NA	NA	7.41	NA	NA	12	NA	19.53	NA	29.52	NA	38.76	53.36	64.64	NA	NA	9.54	20.28	24.16	42.08	48	67.96	75.92	NA
Thyromey	Thyrohyrax	meyeri	DPC	9591		DPC	NA	NA	NA	NA	NA	NA	7.41	NA	11.76	NA	17.67	NA	20.3	29.24	NA	NA	NA	5.85	15.04	11.36	23.58	22.93	38.18	NA	NA
Thyromey	Thyrohyrax	meyeri	DPC	20828		DPC	NA	NA	NA	NA	NA	NA	7.2	NA	10.81	NA	NA	NA	20.06	23.5	NA	NA	NA	NA	NA	14.96	NA	NA	30.26	NA	NA
Thyromey	Thyrohyrax	meyeri	DPC	17675		DPC	NA	NA	NA	NA	NA	10.5	NA	14.21	NA	18.36	NA	22.04	NA	27.88	35.42	48.88	NA	NA	NA	NA	20.34	21.96	38.38	42.96	62.34
Thyromey	Thyrohyrax	meyeri	DPC	20777		DPC	NA	NA	NA	4.32	NA	10.4	NA	14.72	NA	19.24	NA	22.4	NA	23.01	35.77	49.35	NA	NA	NA	NA	10.25	22.19	36.18	48.53	62.93
Thyromey	Thyrohyrax	meyeri	DPC	17017		DPC	NA	NA	NA	4.5	NA	9.89	NA	14	NA	18.02	NA	NA	NA	25.2	34.2	NA	NA	NA	NA	NA	16.2	NA	NA	43.2	NA
Thyromey	Thyrohyrax	meyeri	DPC	17603		DPC	NA	NA	NA	4.96	NA	12.6	NA	15.19	NA	19.98	NA	22.96	NA	NA	NA	NA	NA	NA	NA	NA	NA	NA	NA	NA	NA
Thyromey	Thyrohyrax	meyeri	DPC	23864		DPC	NA	NA	NA	5.94	NA	10.14	NA	12.47	NA	18	NA	25.65	NA	NA	NA	NA	NA	NA	NA	NA	NA	NA	NA	NA	NA
